# Supplementary material for: Molecular Differences Between Squamous Cell Carcinoma and Adenocarcinoma Cervical Cancer Subtypes: Potential Prognostic Biomarkers
Source: Research Square preprint supplement (doi:10.21203/rs.3.rs-753668/v1), 2021-07-28
Supplement: Supplementary file 1 [file 85e2d83d874810f1c9d71af4.xlsx]

## Sheet: Hoja1
Supplementary Table 2. HPV data from mexican-mestizo cohort
Patients	HPV type	Percentage (%)
27	16	45
2	16/18	3.33333
1	16/31/59	1.66667
1	16/33/52	1.66667
1	16/35/52	1.66667
6	18	10
1	31	1.66667
1	33	1.66667
3	39	5
9	45	15
1	45/51	1.66667
1	51	1.66667
4	58/52	6.66667
1	58/52/45	1.66667
1	6	1.66667
