# Supplementary material for: Molecular Differences Between Squamous Cell Carcinoma and Adenocarcinoma Cervical Cancer Subtypes: Potential Prognostic Biomarkers
Source: Research Square preprint supplement (doi:10.21203/rs.3.rs-753668/v1), 2021-07-28
Supplement: Supplementary file 2 [file b19e11498357a806f90a17a6.xlsx]

## Sheet: Supp_file_2
Supplementary table 4. Mexican-mestizo differentially expressed genes
	SYMBOL	Gene	log2FoldChange_TCGA	pvalue
1	ACY3	ENSG00000132744	3.85048	1.53e-56
2	AGMO	ENSG00000187546	4.43967	3.49e-17
3	ARSL	ENSG00000157399	3.39535	2.53e-21
4	BNC1	ENSG00000169594	-5.13705	2.63e-58
5	BTBD11	ENSG00000151136	-2.54504	1.77e-30
6	CALML3	ENSG00000178363	-5.55574	8.18e-55
7	CDH17	ENSG00000079112	6.20147	1.84e-75
8	CDHR5	ENSG00000099834	5.45459	1.43e-44
9	CFAP221	ENSG00000163075	4.17129	1.18e-29
10	CLCA2	ENSG00000137975	-6.15826	5.87e-77
11	CLRN3	ENSG00000180745	5.12935	1.07e-20
12	CSTA	ENSG00000121552	-5.90969	4.44e-104
13	EPS8L3	ENSG00000198758	5.45039	1.35e-29
14	F5	ENSG00000198734	2.7049	4.41e-22
15	FOXA2	ENSG00000125798	2.87757	4.98e-06
16	GABRB2	ENSG00000145864	2.31745	1.14e-06
17	GAL3ST1	ENSG00000128242	3.68901	1.24e-23
18	GPA33	ENSG00000143167	5.15421	5.33e-58
19	GPR87	ENSG00000138271	-4.67424	1.08e-88
20	GSDMC	ENSG00000147697	-3.73843	5.87e-59
21	HABP2	ENSG00000148702	5.11779	2.6e-40
22	HCAR2	ENSG00000182782	-4.17137	2.77e-67
23	HCAR3	ENSG00000255398	-4.43114	2.76e-50
24	HES2	ENSG00000069812	-3.02848	1.48e-33
25	HGD	ENSG00000113924	4.24004	4.95e-26
26	HNF1A	ENSG00000135100	5.63643	5.58e-45
27	HNF1A-AS1	ENSG00000241388	4.37225	3.36e-20
28	HNF4A	ENSG00000101076	5.49758	1.6e-37
29	HOXD11	ENSG00000128713	-2.75238	2.37e-26
30	IRF6	ENSG00000117595	-2.01516	9.44e-44
31	KRT6A	ENSG00000205420	-5.83665	8.16e-89
32	KRT6B	ENSG00000185479	-5.67515	1.56e-59
33	KRT6C	ENSG00000170465	-7.30603	3.16e-70
34	LPAR3	ENSG00000171517	-2.19806	1.13e-20
35	LRRC31	ENSG00000114248	4.83476	7.38e-19
36	METTL7B	ENSG00000170439	3.25253	5.98e-30
37	MGAM2	ENSG00000257743	6.6263	1.87e-35
38	MOGAT3	ENSG00000106384	3.41535	2.01e-19
39	MUC13	ENSG00000173702	4.33471	2.25e-18
40	MYO1A	ENSG00000166866	5.24998	6.66e-70
41	MYO7B	ENSG00000169994	4.62348	7.96e-38
42	PCDHA6	ENSG00000081842	2.56468	7.85e-11
43	PCDHA9	ENSG00000204961	2.37278	1.09e-12
44	PCDHAC1	ENSG00000248383	3.39853	1.38e-12
45	PCDHAC2	ENSG00000243232	2.98291	2.66e-11
46	PDZD3	ENSG00000172367	4.90749	1.93e-53
47	PKP1	ENSG00000081277	-5.05411	1.39e-67
48	PPP1R1B	ENSG00000131771	4.11798	1.66e-20
49	PROM1	ENSG00000007062	3.57326	1.8e-14
50	PRR15L	ENSG00000167183	2.67708	2.65e-22
51	PRR26	ENSG00000180525	3.98308	4.4e-36
52	RNF186	ENSG00000178828	4.96903	6.53e-17
53	S100A2	ENSG00000196754	-2.70691	1.24e-23
54	S100A9	ENSG00000163220	-4.07835	1.92e-41
55	S1PR5	ENSG00000180739	-3.70446	1.4e-66
56	SERPINA4	ENSG00000100665	5.31677	2.79e-14
57	SERPINB3	ENSG00000057149	-2.93052	1.81e-19
58	SERPINB4	ENSG00000206073	-3.49955	1.13e-25
59	SGK2	ENSG00000101049	3.39612	7.11e-35
60	SPINK1	ENSG00000164266	3.0335	1.48e-08
61	SPRR1B	ENSG00000169469	-6.57866	1.23e-62
62	SPRR2A	ENSG00000241794	-6.43347	1.52e-52
63	TFF2	ENSG00000160181	5.19363	8.7e-18
64	TM4SF5	ENSG00000142484	4.37369	6.77e-12
65	TMEM40	ENSG00000088726	-3.5849	6.92e-52
66	TP63	ENSG00000073282	-5.59316	5.16e-91
67	TSPAN8	ENSG00000127324	3.83905	9.56e-16
68	USH1C	ENSG00000006611	4.34375	1.71e-17
69	VIL1	ENSG00000127831	4.87667	3.34e-21
70	ZNF750	ENSG00000141579	-3.20841	1.86e-37
